# Supplementary material for: Contributions of the maternal oral and gut microbiome to placental microbial colonization in overweight and obese pregnant women
Source: PubMed Central journal article supplement (PMC5460277; doi:10.1038/s41598-017-03066-4), 2017-06-06

## **Supplementary Information**

**Contributions of the maternal oral and gut microbiome to placental microbial colonization in overweight and obese pregnant women.**

*Luisa F. Gomez-Arango, Helen. L. Barrett, H. David. McIntyre, Leonie K. Callaway, Mark Morrison, Marloes Dekker Nitert.*

**Supplementary Table 1. Total number of OTUs before and after quality filtering.**

| Body site | Total number of OTUs before quality filtering | Total number of OTUs after quality filtering |
|-----------|-----------------------------------------------|----------------------------------------------|
| Fecal     | 645589                                        | 644579                                       |
| Oral      | 2154107                                       | 2074522                                      |
| Placenta  | 29765                                         | 26972                                        |

**Supplementary Figure 1. Rarefaction analysis by Chao 1 Index showing sequencing data from oral (blue), fecal (red) and placenta (orange).**

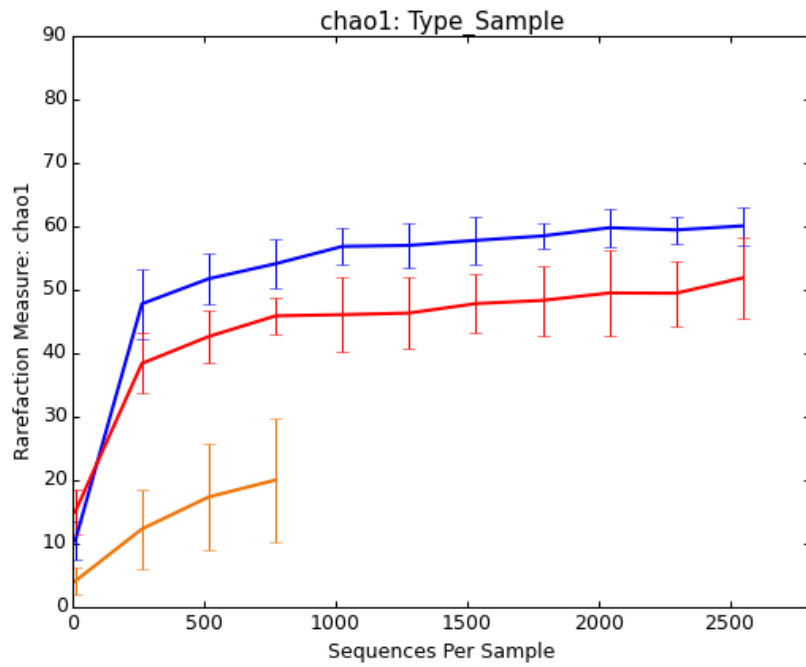

**Supplementary Table 2. List of OTUs detected in the placental negative controls.**

| <b>Family</b>                 | <b>Genus</b>             | <b>Species</b>       | <b>Number of identified taxa</b> |
|-------------------------------|--------------------------|----------------------|----------------------------------|
| <i>Bradyrhizobiaceae</i>      | <i>Afipia</i>            |                      | 1                                |
| <i>Dermabacteraceae</i>       | <i>Brachybacterium</i>   | <i>conglomeratum</i> | 2                                |
| <i>Bradyrhizobiaceae</i>      |                          |                      | 4                                |
| <i>Bradyrhizobiaceae</i>      | <i>Bradyrhizobium</i>    | <i>elkanii</i>       | 2                                |
| <i>Comamonadaceae</i>         |                          |                      | 2                                |
| <i>Corynebacteriaceae</i>     | <i>Corynebacterium</i>   |                      | 6                                |
| <i>Aerococcaceae</i>          | <i>Facklamia</i>         |                      | 1                                |
| <i>Lactobacillaceae</i>       | <i>Lactobacillus</i>     |                      | 2                                |
| <i>Lactobacillaceae</i>       | <i>Lactobacillus</i>     | <i>salivarius</i>    | 2                                |
| <i>Methylobacteriaceae</i>    | <i>Methylobacterium</i>  |                      | 3                                |
| <i>Norcardioidaceae</i>       |                          |                      | 2                                |
| <i>Propionibacteriaceae</i>   | <i>Propionibacterium</i> | <i>acnes</i>         | 1                                |
| <i>Pseudoalteromonadaceae</i> | <i>Pseudoalteromonas</i> |                      | 1                                |
| <i>Pseudomonadaceae</i>       | <i>Pseudomonas</i>       |                      | 3                                |
| <i>Rhodobacteraceae</i>       | <i>Rhodobacter</i>       |                      | 1                                |
| <i>Rhodobacteraceae</i>       |                          |                      | 1                                |
| <i>Rhodocyclaceae</i>         |                          |                      | 1                                |
| <i>Sphingobacteriaceae</i>    | <i>Sphingobacterium</i>  | <i>multivorum</i>    | 2                                |
| <i>Staphylococcaceae</i>      | <i>Staphylococcus</i>    |                      | 9                                |
| <i>Staphylococcaceae</i>      | <i>Staphylococcus</i>    | <i>aureus</i>        | 2                                |
| <i>Staphylococcaceae</i>      | <i>Staphylococcus</i>    | <i>epidermis</i>     | 4                                |
| <i>Streptococcaceae</i>       | <i>Streptococcus</i>     |                      | 2                                |

**Supplementary Figure 2. Differences in the relative abundance of gut, oral and placental taxa at phylum level before normalization.**

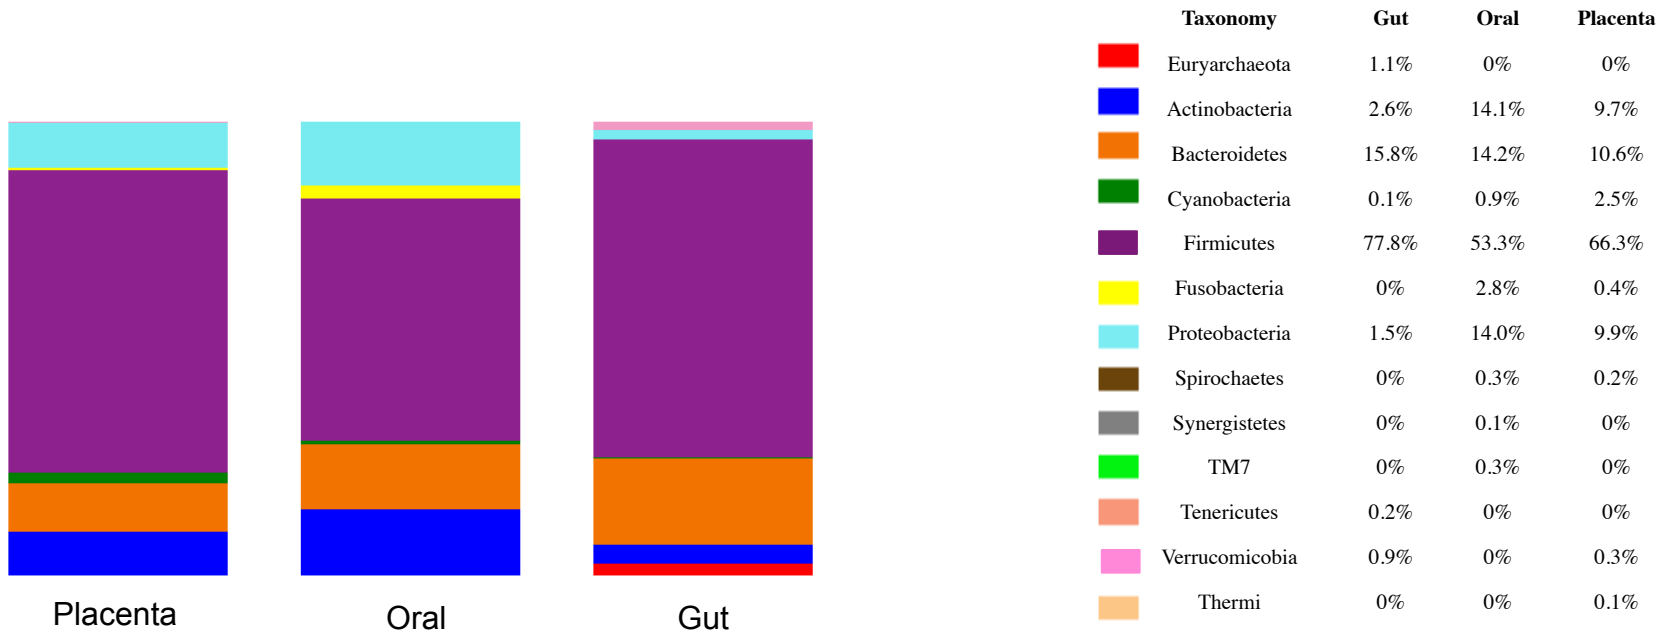

**Supplementary Figure 3. Differences in the relative abundance of gut, oral and placental taxa at phylum level after normalization.**

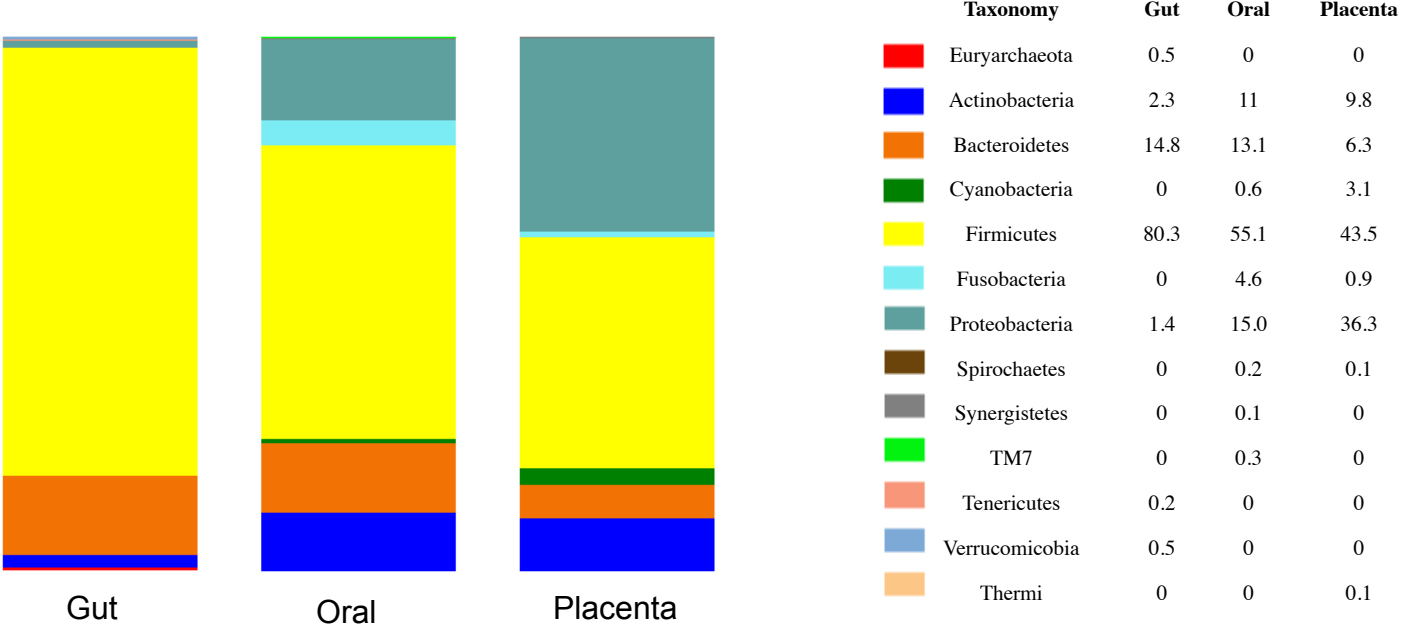



**Supplementary Figure 5. Clustering of placental samples and negative control using unsupervised ordination methods. S2a)** Non-metric multidimensional scaling analysis based on the pairwise dissimilarity between the placenta and negative control samples. **S2b)** Principal component analysis showing the variance between placental samples and negative control. **S2c)** Principal coordinate analysis showing the phylogenetic distance between placental samples and negative control.

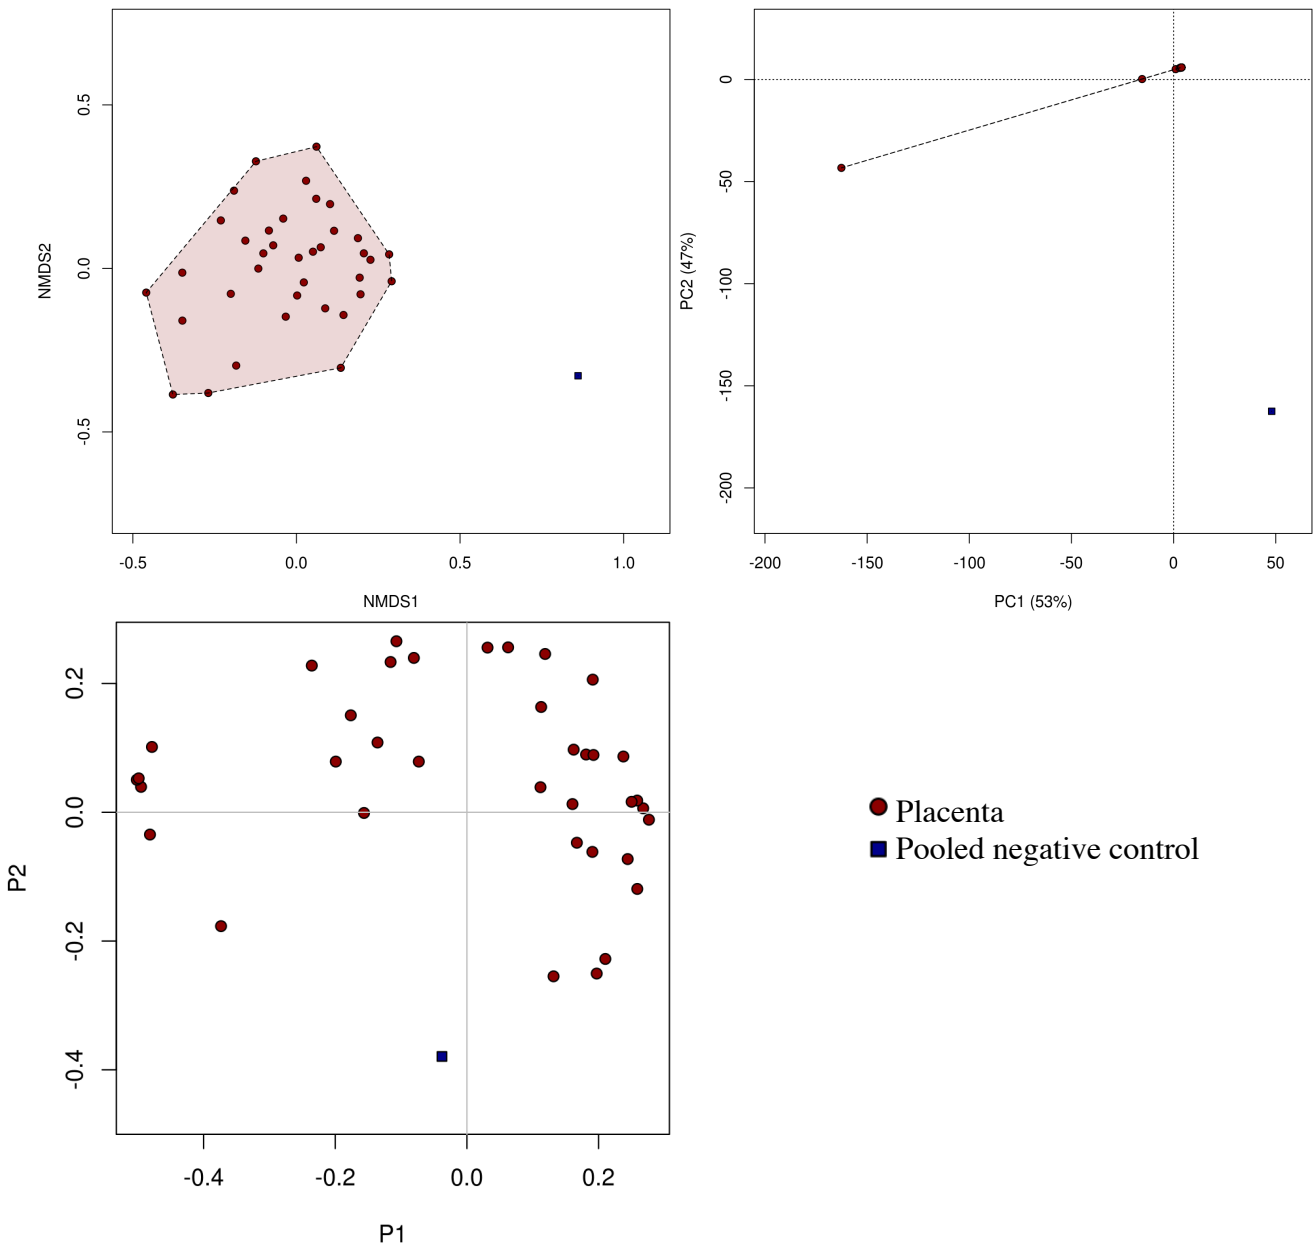

**Supplementary Figure 6. Differences in microbiome composition among the gut, oral and placental samples.**

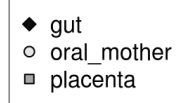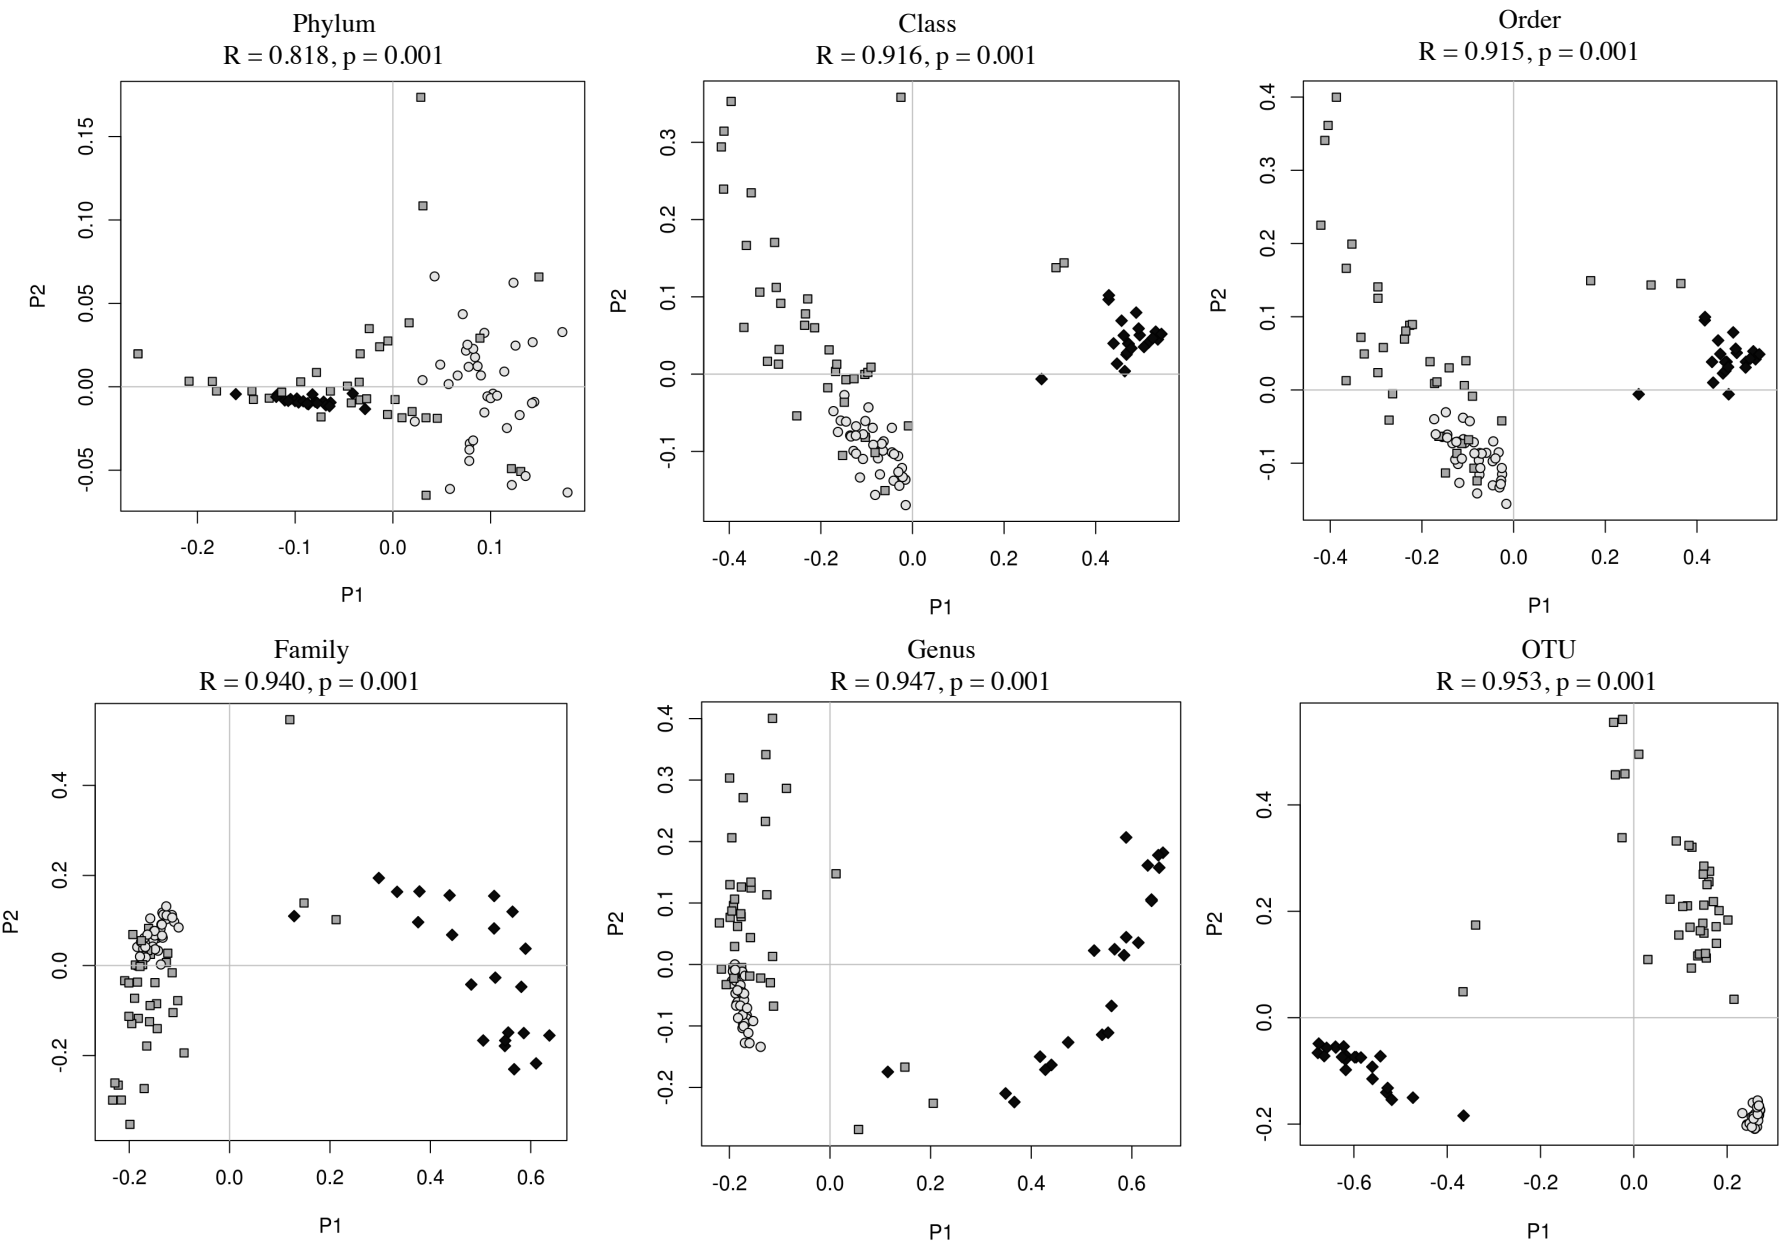



**Supplementary Figure 7. Core shared and distinct families between the maternal gut, oral and placental microbiome. All families present in the core microbiome of each body site are listed.**

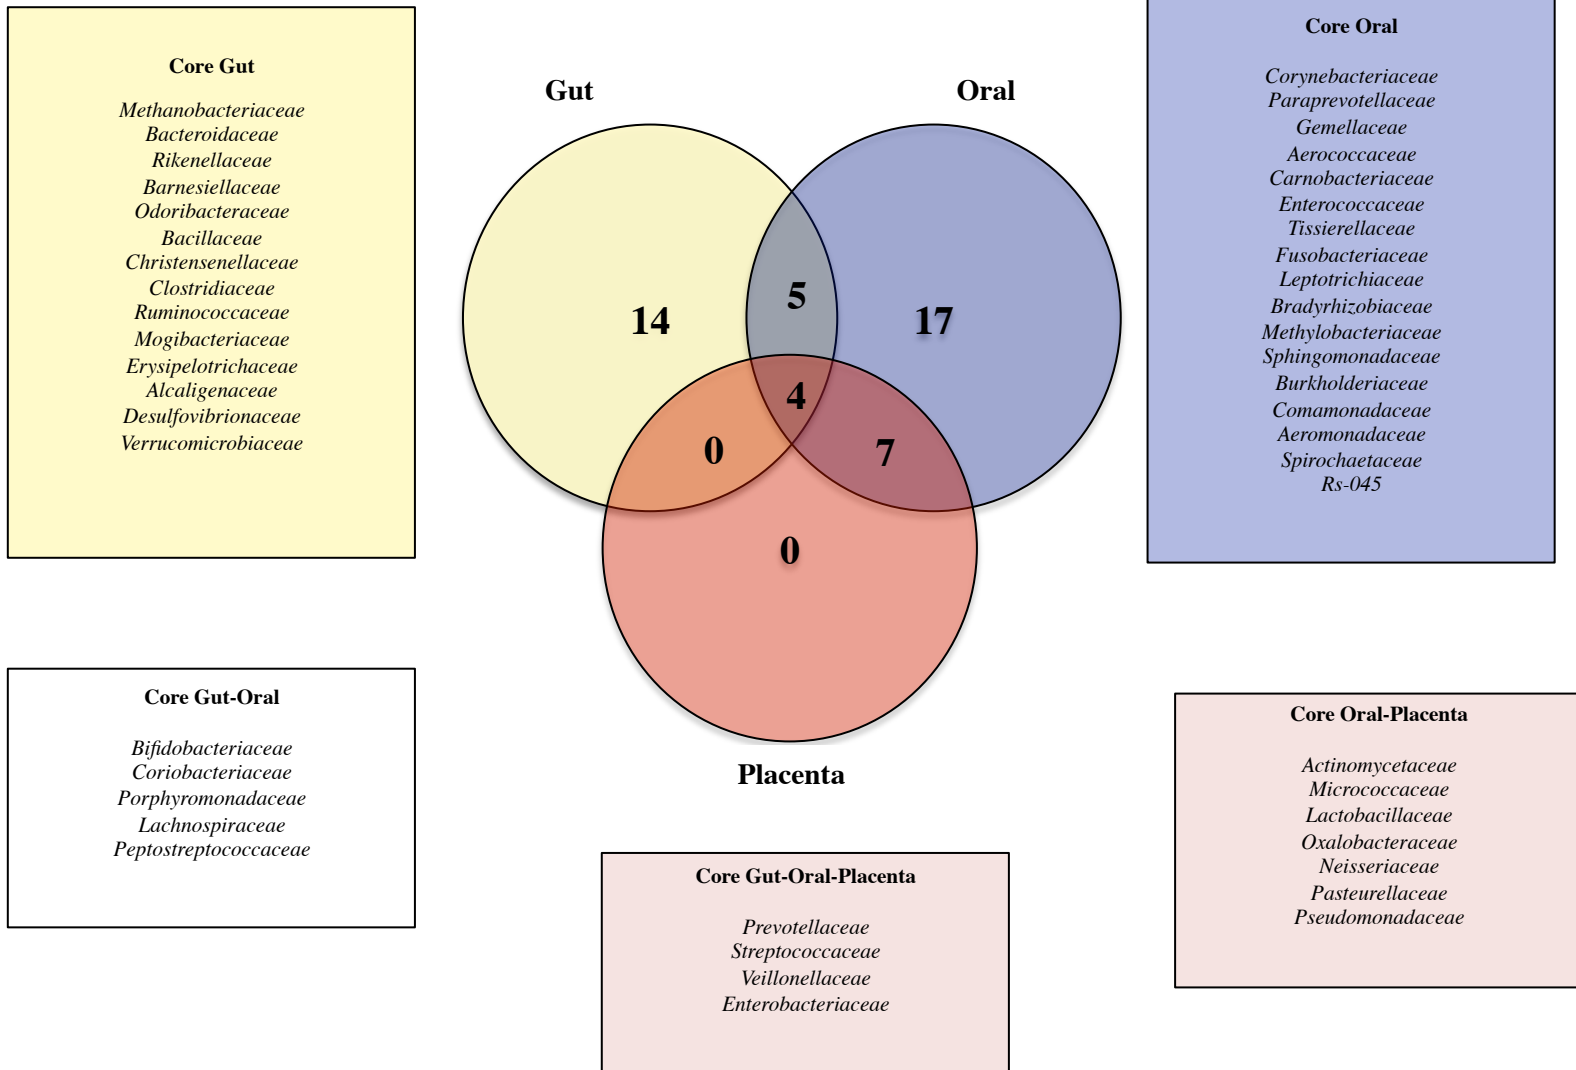

**Supplementary Table 3. List of core shared and distinct genera between the maternal gut, oral and placental microbiome.**

| <b>Core gut</b>              | <b>Core oral</b>          | <b>Core gut and core oral</b> | <b>Core oral and core placenta</b> | <b>Core oral, core placenta and core gut</b> |
|------------------------------|---------------------------|-------------------------------|------------------------------------|----------------------------------------------|
| <i>Methanobrevibacter</i>    | <i>Corynebacterium</i>    | <i>Dialister</i>              | <i>Actinomyces</i>                 | <i>Streptococcus</i>                         |
| <i>Bifidobacterium</i>       | <i>Scardovia</i>          |                               | <i>Rothia</i>                      | <i>Veillonella</i>                           |
| <i>Adlercreutzia</i>         | <i>Atopobium</i>          |                               | <i>Lactobacillus</i>               | <i>Prevotella</i>                            |
| <i>Collinsella</i>           | <i>Porphyromonas</i>      |                               | <i>Haemophilus</i>                 |                                              |
| <i>Eggerthella</i>           | <i>Gemella</i>            |                               | <i>Pseudomonas</i>                 |                                              |
| <i>Bacteroides</i>           | <i>Aerococcus</i>         |                               |                                    |                                              |
| <i>Parabacteroides</i>       | <i>Granulicatella</i>     |                               |                                    |                                              |
| <i>Butyricimonas</i>         | <i>Catonella</i>          |                               |                                    |                                              |
| <i>Odoribacter</i>           | <i>Oribacterium</i>       |                               |                                    |                                              |
| <i>Clostridium</i>           | <i>Peptostreptococcus</i> |                               |                                    |                                              |
| <i>SMB53</i>                 | <i>Megasphaera</i>        |                               |                                    |                                              |
| <i>Blautia</i>               | <i>Selenomonas</i>        |                               |                                    |                                              |
| <i>Coprococcus</i>           | <i>Parvimonas</i>         |                               |                                    |                                              |
| <i>Dorea</i>                 | <i>Fusobacterium</i>      |                               |                                    |                                              |
| <i>Lachnospira</i>           | <i>Leptotrichia</i>       |                               |                                    |                                              |
| <i>Roseburia</i>             | <i>Bradyrhizobium</i>     |                               |                                    |                                              |
| <i>Ruminococcus</i>          | <i>Methylobacterium</i>   |                               |                                    |                                              |
| <i>Anaerotruncus</i>         | <i>Sphingomonas</i>       |                               |                                    |                                              |
| <i>Faecalibacterium</i>      | <i>Lautropia</i>          |                               |                                    |                                              |
| <i>Oscillospira</i>          | <i>Kingella</i>           |                               |                                    |                                              |
| <i>Phascolarctobacterium</i> | <i>Neisseria</i>          |                               |                                    |                                              |
| <i>Eubacterium</i>           | <i>Actinobacillus</i>     |                               |                                    |                                              |
| <i>Sutterella</i>            | <i>Aggregatibacter</i>    |                               |                                    |                                              |
| <i>Bilophila</i>             | <i>Treponema</i>          |                               |                                    |                                              |
| <i>Akkermansia</i>           |                           |                               |                                    |                                              |

Supplementary Figure 8. OTUs belonging to genera *Streptococcus*, *Prevotella* and *Veillonella* in all three sample types.

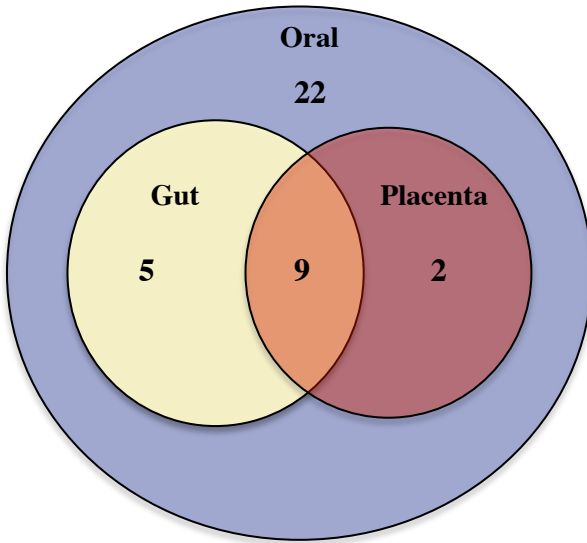

| Taxa                                 | type   | details                  | gut.abu | oral_mother.abu | placenta.abu | gut.occ | oral_mother.occ | placenta.occ |
|--------------------------------------|--------|--------------------------|---------|-----------------|--------------|---------|-----------------|--------------|
| X994939_Streptococcus_s__            | pan    | oral_mother&placenta     | 0.09    | 8.558           | 3.236        | 0.05    | 1               | 0.46         |
| X937248_Veillonella_s_dispar         | core   | gut&oral_mother&placenta | 2.185   | 9.997           | 3.655        | 0.55    | 1               | 0.54         |
| X935742_Prevotella_s_melaninogenica  | unique | oral_mother              | 0       | 2.853           | 0.173        | 0       | 0.78            | 0.03         |
| X916151_Veillonella_s__              | unique | oral_mother              | 0       | 3.847           | 0.329        | 0       | 0.7             | 0.05         |
| X878104_Veillonella_s_dispar         | pan    | gut&oral_mother          | 1.983   | 7.445           | 1.597        | 0.55    | 1               | 0.24         |
| X873174_Veillonella_s_dispar         | pan    | gut&oral_mother          | 1.868   | 6.73            | 1.805        | 0.5     | 1               | 0.27         |
| X861780_Prevotella_s__               | unique | oral_mother              | 0       | 3.183           | 0.477        | 0       | 0.68            | 0.08         |
| X72112_Prevotella_s_intermedia       | unique | oral_mother              | 0       | 2.354           | 1.304        | 0       | 0.51            | 0.19         |
| X593803_Streptococcus_s__            | unique | oral_mother              | 0.309   | 6.845           | 0.901        | 0.18    | 1               | 0.14         |
| X567427_k_Streptococcus_s__          | pan    | gut&oral_mother          | 1.017   | 3.271           | 0            | 0.5     | 0.76            | 0            |
| X535359_Prevotella_s__               | core   | gut&oral_mother&placenta | 1.475   | 7.475           | 2.77         | 0.41    | 0.97            | 0.46         |
| X511378_Veillonella__NA              | unique | oral_mother              | 0.703   | 7.526           | 0.81         | 0.27    | 1               | 0.14         |
| X45270_Veillonella_s_dispar          | unique | oral_mother              | 0       | 6.865           | 0.332        | 0       | 1               | 0.05         |
| X44165_Streptococcus_s__             | unique | oral_mother              | 0       | 6.183           | 0.497        | 0       | 1               | 0.08         |
| X4329957_Prevotella_s__              | core   | gut&oral_mother&placenta | 2.155   | 4.919           | 3.183        | 0.59    | 0.86            | 0.49         |
| X4307897_Streptococcus_s__           | unique | oral_mother              | 0.02    | 4.729           | 0.189        | 0.05    | 0.81            | 0.03         |
| X4307391_Prevotella_s_melaninogenica | unique | oral_mother              | 0       | 4.544           | 0            | 0       | 0.84            | 0            |
| X3746312_Prevotella_s_nigrescens     | unique | oral_mother              | 0       | 5.073           | 0.699        | 0       | 0.92            | 0.11         |
| X269907_Prevotella_s__               | unique | oral_mother              | 0       | 3.104           | 0.338        | 0       | 0.57            | 0.05         |
| X2228_Prevotella_s__                 | unique | oral_mother              | 0       | 5.016           | 0.51         | 0       | 0.95            | 0.08         |
| X1891602_Prevotella_s_nigrescens     | unique | oral_mother              | 0       | 6.437           | 0.881        | 0       | 0.97            | 0.14         |
| X1098340_Streptococcus_s__           | core   | gut&oral_mother&placenta | 4.754   | 13.408          | 10.006       | 1       | 1               | 0.97         |
| X1097208_Streptococcus_s__           | core   | gut&oral_mother&placenta | 1.007   | 6.44            | 3.642        | 0.45    | 1               | 0.51         |
| X1092300_Streptococcus_s__           | core   | gut&oral_mother&placenta | 2.965   | 7.389           | 4.422        | 0.77    | 1               | 0.65         |
| X1088134_Streptococcus_s__           | core   | gut&oral_mother&placenta | 1.17    | 10.613          | 7.362        | 0.5     | 1               | 0.89         |
| X1085832_Streptococcus_s__           | core   | gut&oral_mother&placenta | 6.974   | 9.244           | 4.931        | 1       | 1               | 0.68         |
| X1082539_Streptococcus_s__           | pan    | gut&oral_mother          | 2.089   | 5.846           | 1.385        | 0.68    | 1               | 0.22         |
| X1068499_Streptococcus_s__           | pan    | gut&oral_mother          | 1.233   | 7.924           | 1.645        | 0.45    | 1               | 0.22         |
| X1066621_Prevotella_s_melaninogenica | unique | oral_mother              | 0.569   | 7.068           | 1.993        | 0.18    | 0.97            | 0.3          |
| X1061897_Streptococcus_s__           | pan    | oral_mother&placenta     | 0.042   | 6.979           | 3.719        | 0.05    | 1               | 0.51         |
| X1048420_Streptococcus_s__           | unique | oral_mother              | 0       | 5.456           | 1.425        | 0       | 1               | 0.22         |
| X1039405_Streptococcus_s__           | unique | oral_mother              | 0.312   | 7.582           | 1.802        | 0.18    | 1               | 0.27         |
| X1027587_Streptococcus_s__           | core   | gut&oral_mother&placenta | 1.61    | 7.975           | 3.184        | 0.55    | 1               | 0.43         |
| X1023988_Streptococcus_s__           | unique | oral_mother              | 0       | 6.212           | 2.054        | 0       | 1               | 0.32         |
| X1019878_Veillonella_s_dispar        | unique | oral_mother              | 0.147   | 7.074           | 1.651        | 0.05    | 1               | 0.24         |
| X1019609_Streptococcus_s__           | unique | oral_mother              | 0.205   | 6.299           | 2.343        | 0.14    | 1               | 0.35         |
| X10017_Veillonella_s_parvula         | unique | oral_mother              | 0.147   | 6.139           | 1.282        | 0.05    | 1               | 0.24         |
| X1000269_Streptococcus_s__           | unique | oral_mother              | 0.084   | 6.874           | 0.642        | 0.05    | 1               | 0.11         |

### Supplementary Figure 9. Differences between vaginal and C-section delivery in microbiome composition

**5a)** PCoA plots at family and genus level reveal no clustering of the placental microbiome grouped by type of delivery (family:  $R = 0.019$ ,  $p = 0.259$ , genus:  $R = 0.016$ ,  $p = 0.272$ ). **5b)** Alpha diversity analyses according to type of delivery (family: shannon  $p = 0.929$ , chao-1  $p = 0.568$ , genus: shannon  $p = 0.873$ , chao-1,  $p = 0.562$ ) reveal no differences within samples according to type of delivery.

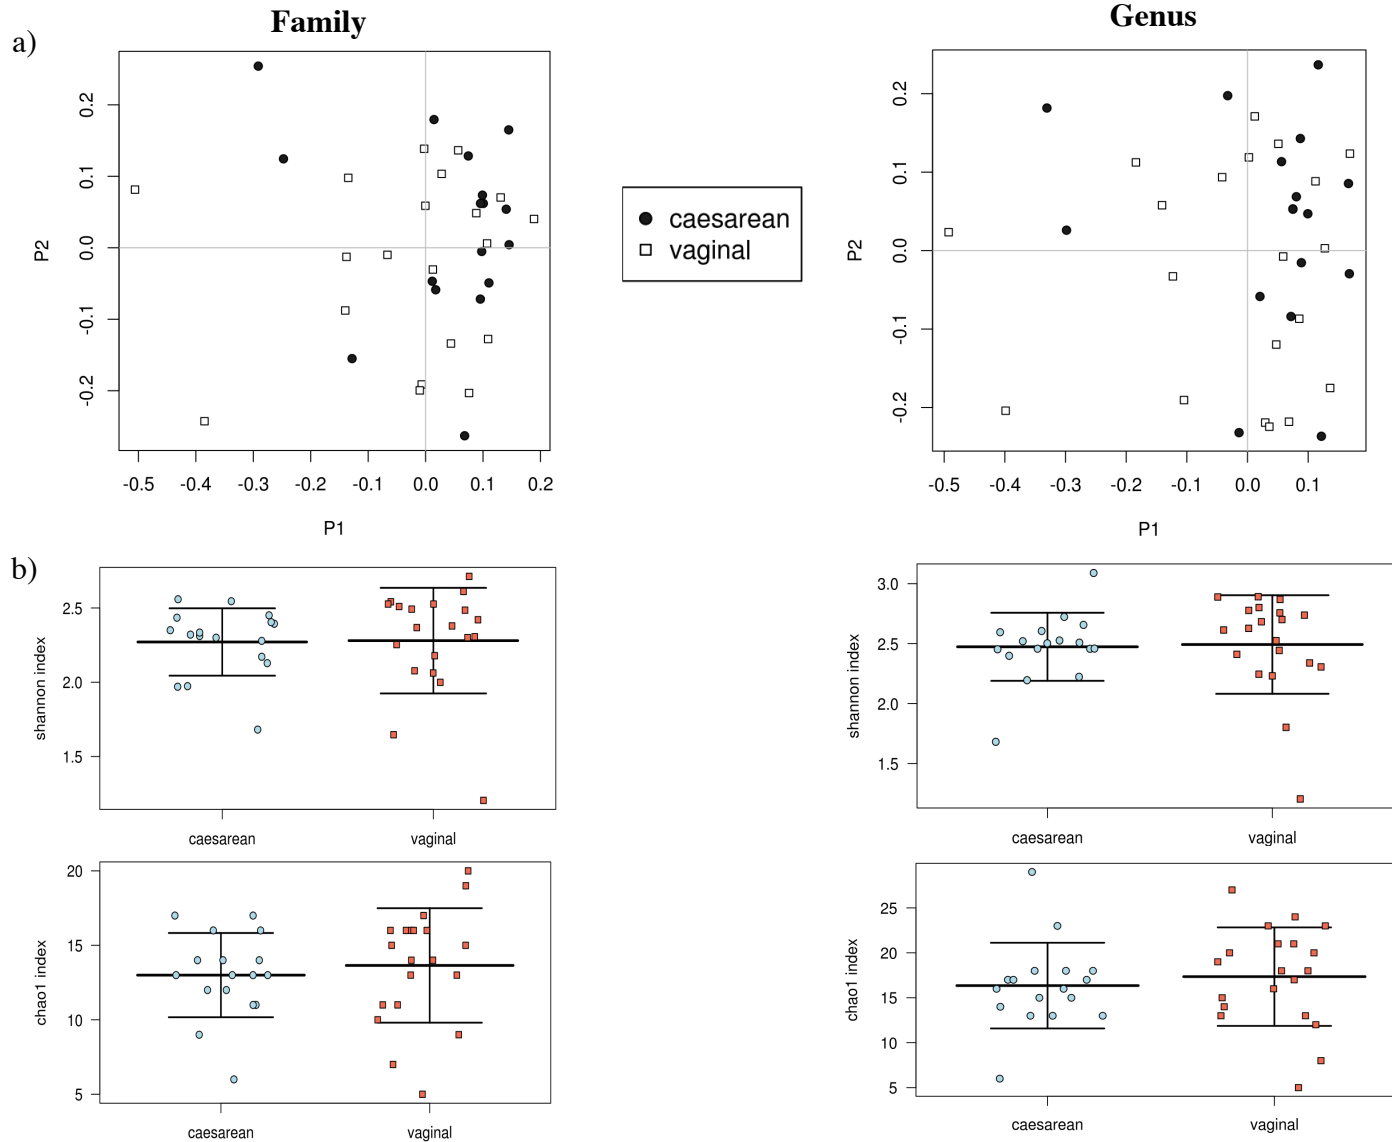

## Supplementary Figure 10. Family and genus FDR values assorted by type of delivery. No significant difference in microbial abundance between caesarean and vaginally delivered placenta.

OddsRatio caesarean/vaginal  
Top 30 biomarker candidates

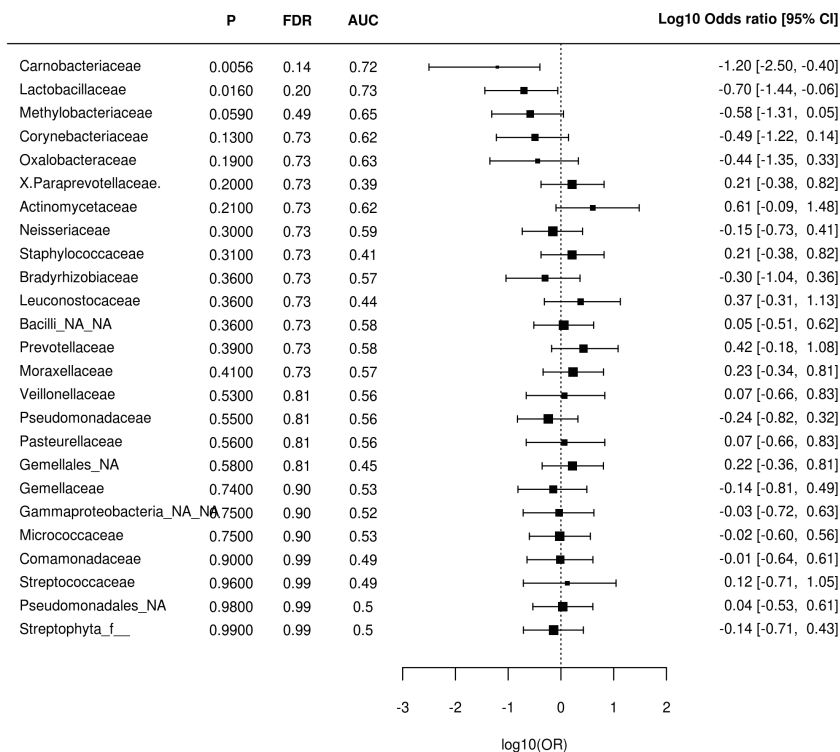

OddsRatio caesarean/vaginal  
Top 30 biomarker candidates

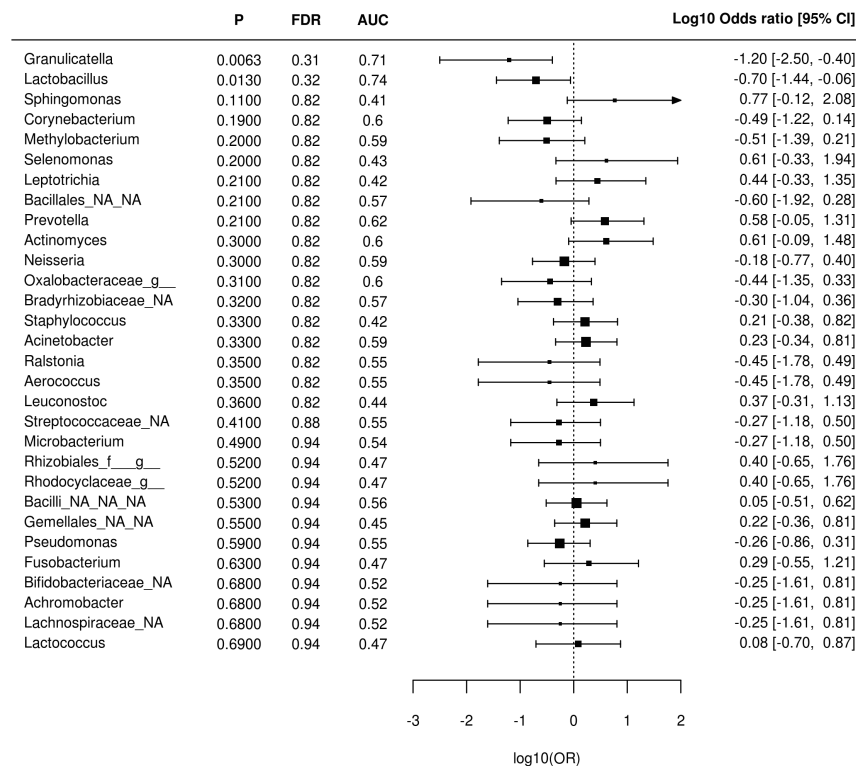

**Supplementary Figure 11. Predictive metabolic pathways determined by PiCrust for all three body sites. Metabolic function was compared by LEfSe.** Metabolism of tryptophan, fatty acid and benzoate degradation were pathways significantly enriched in the placental microbial communities.

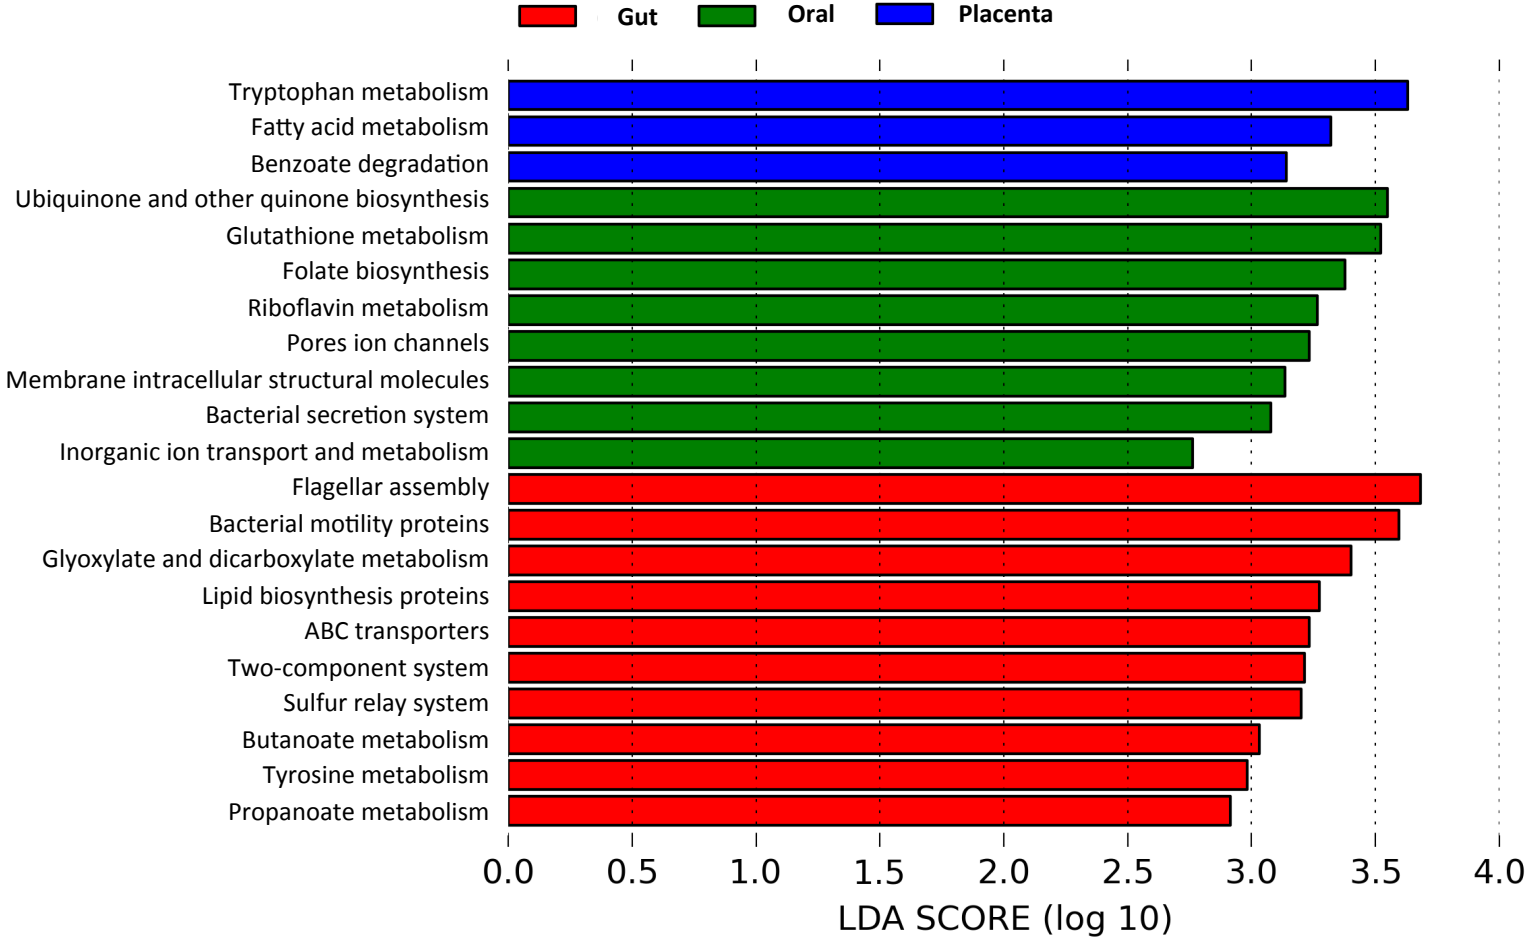

Supplement: 41598_2017_3066_MOESM1_ESM.pdf [file 41598_2017_3066_MOESM1_ESM.pdf]
